# Supplementary material
Source: PubMed Central journal article supplement (PMC4288813)

# Supplemental Figure 1A

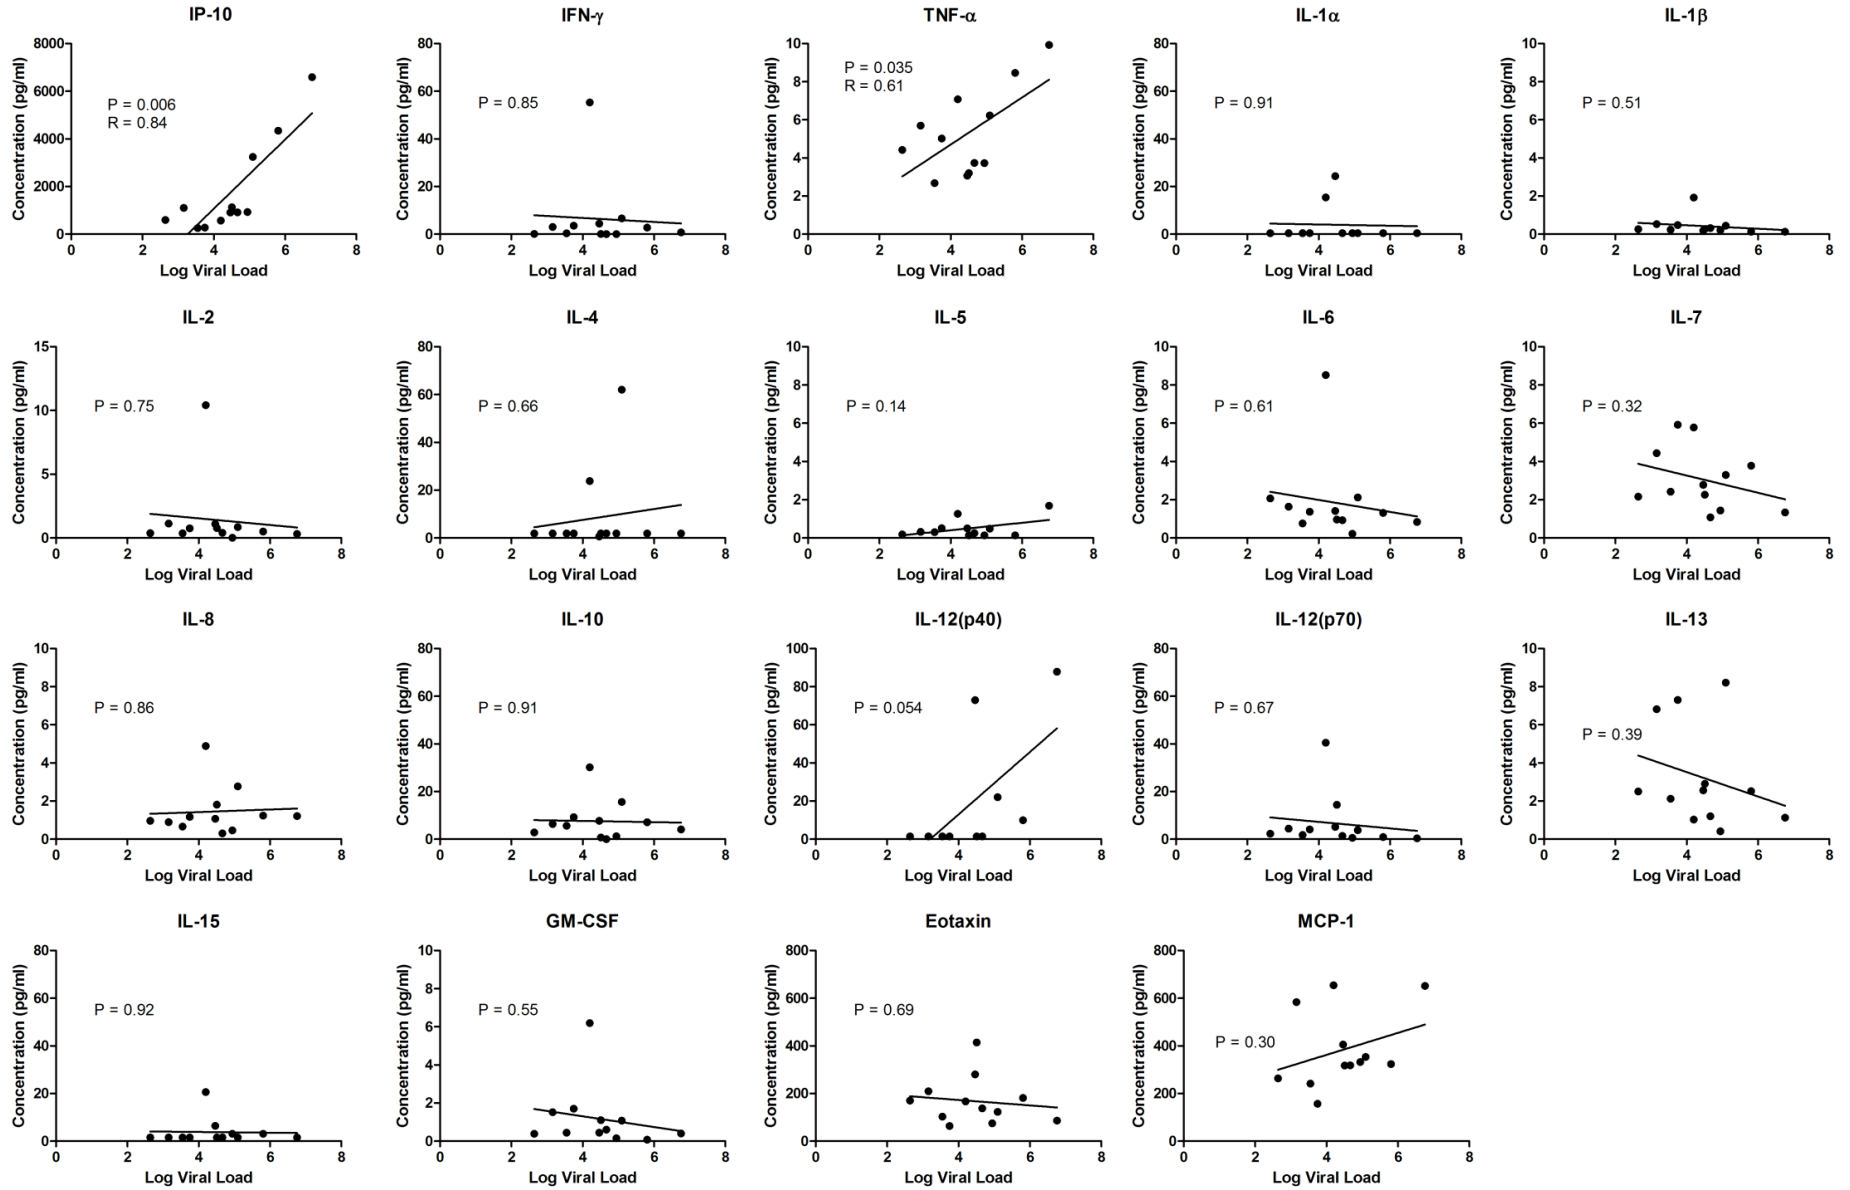

# Supplemental Figure 1B

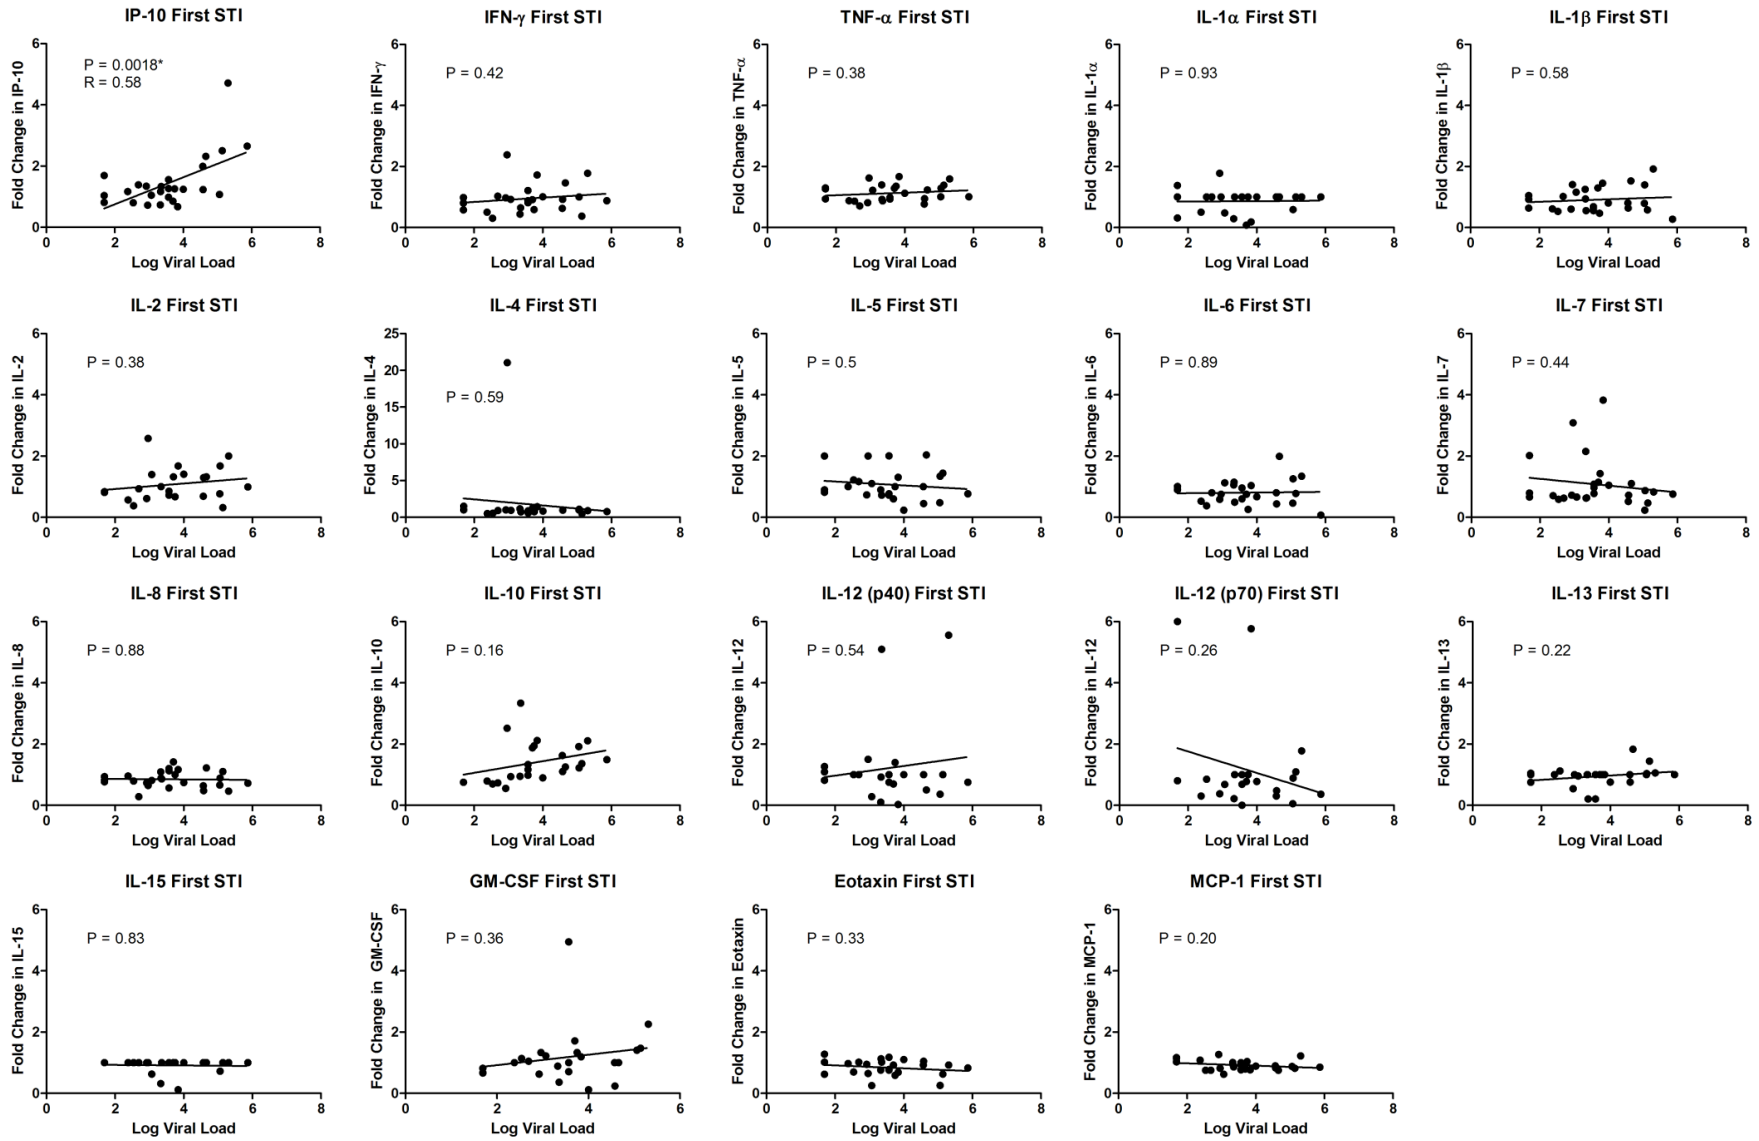

# Supplemental Figure 2

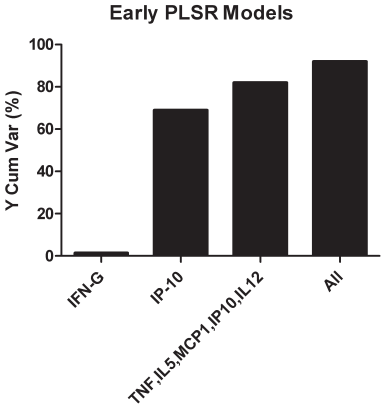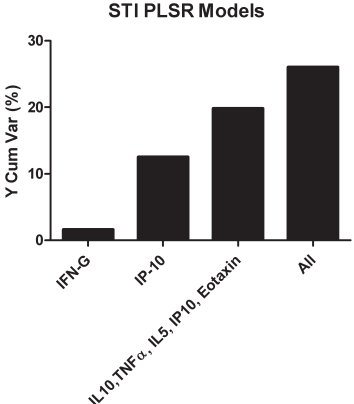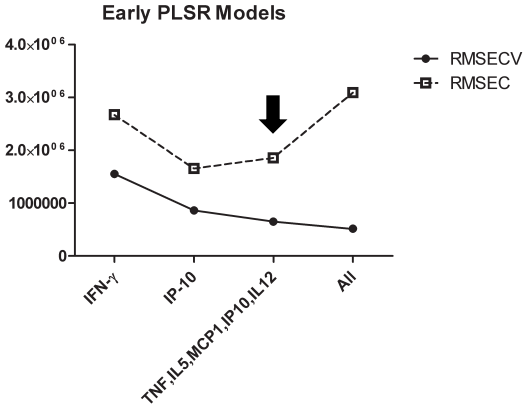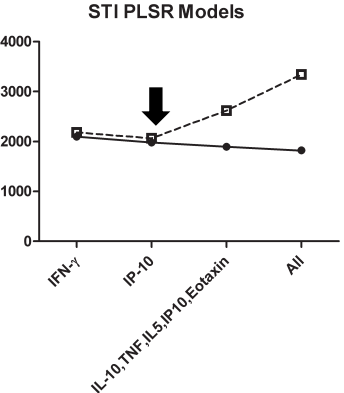

# Supplemental Figure 3

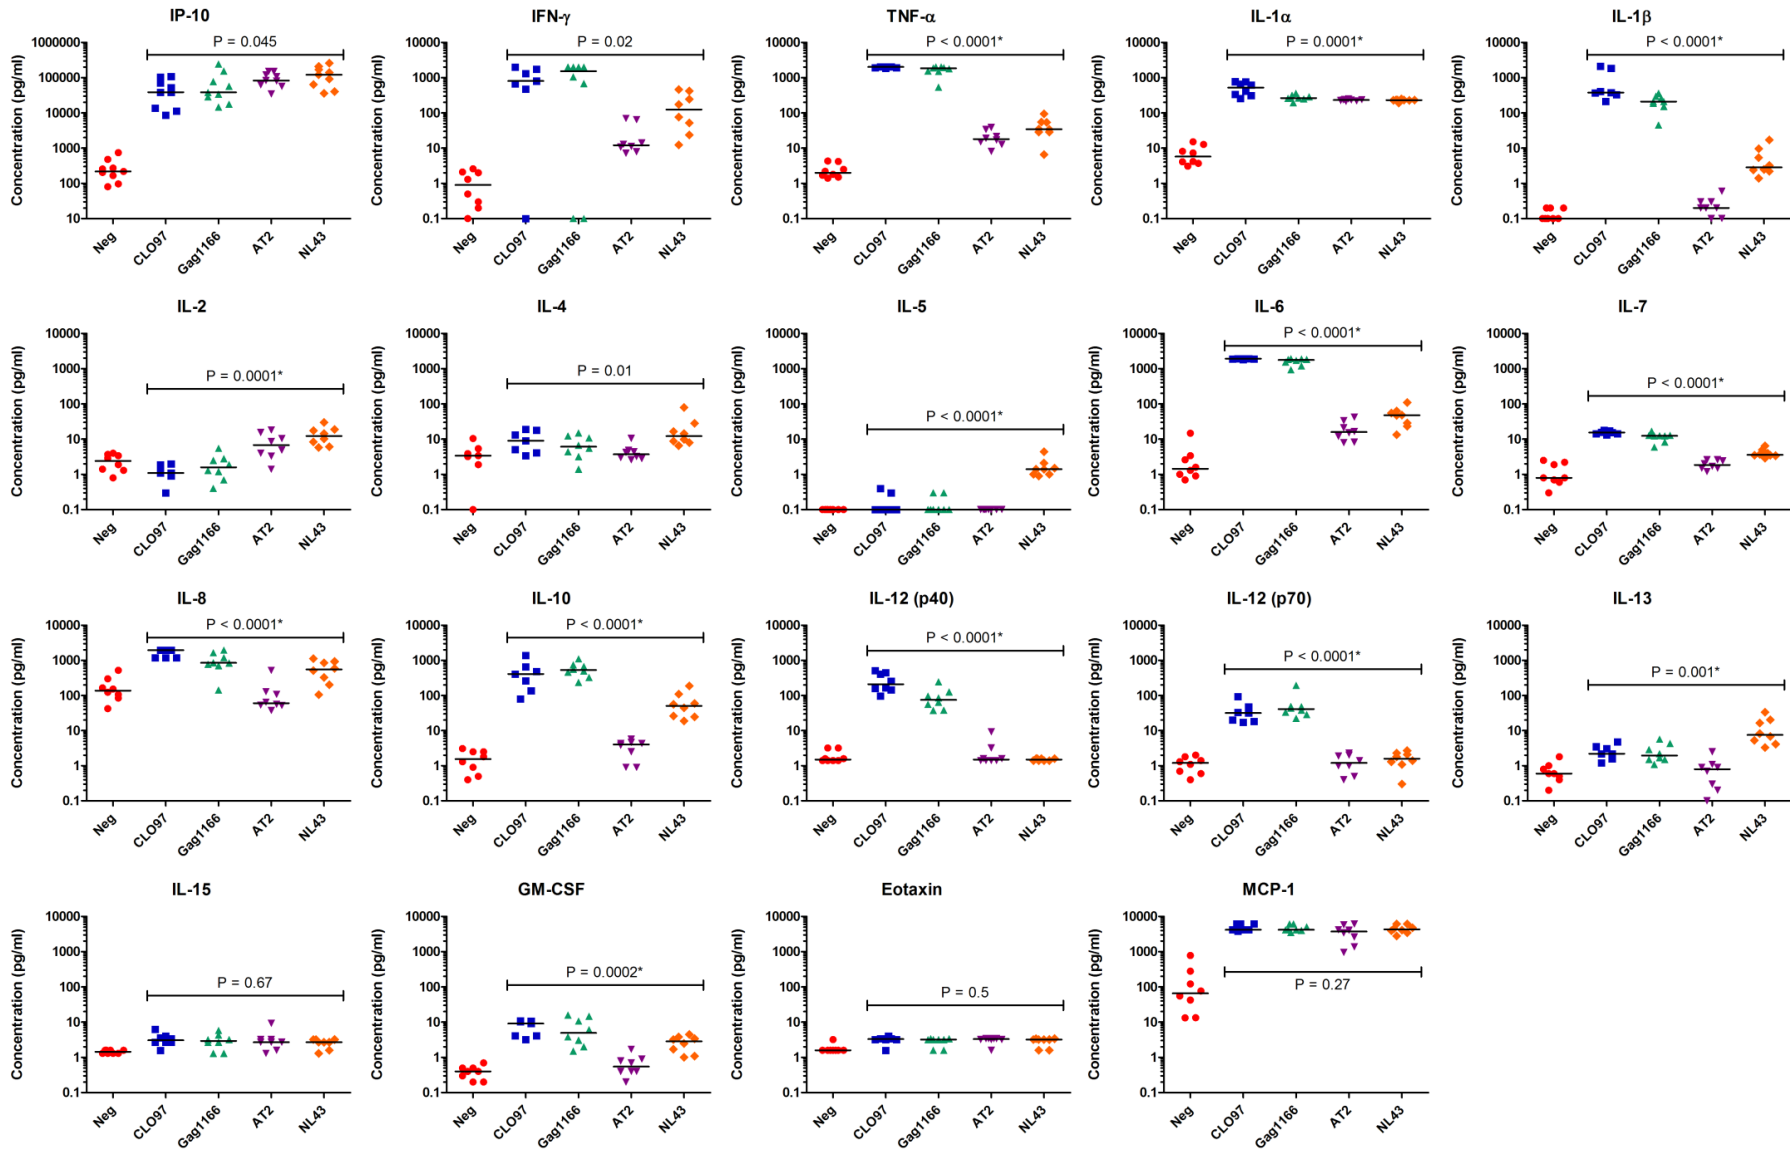

# Supplemental Figure 4

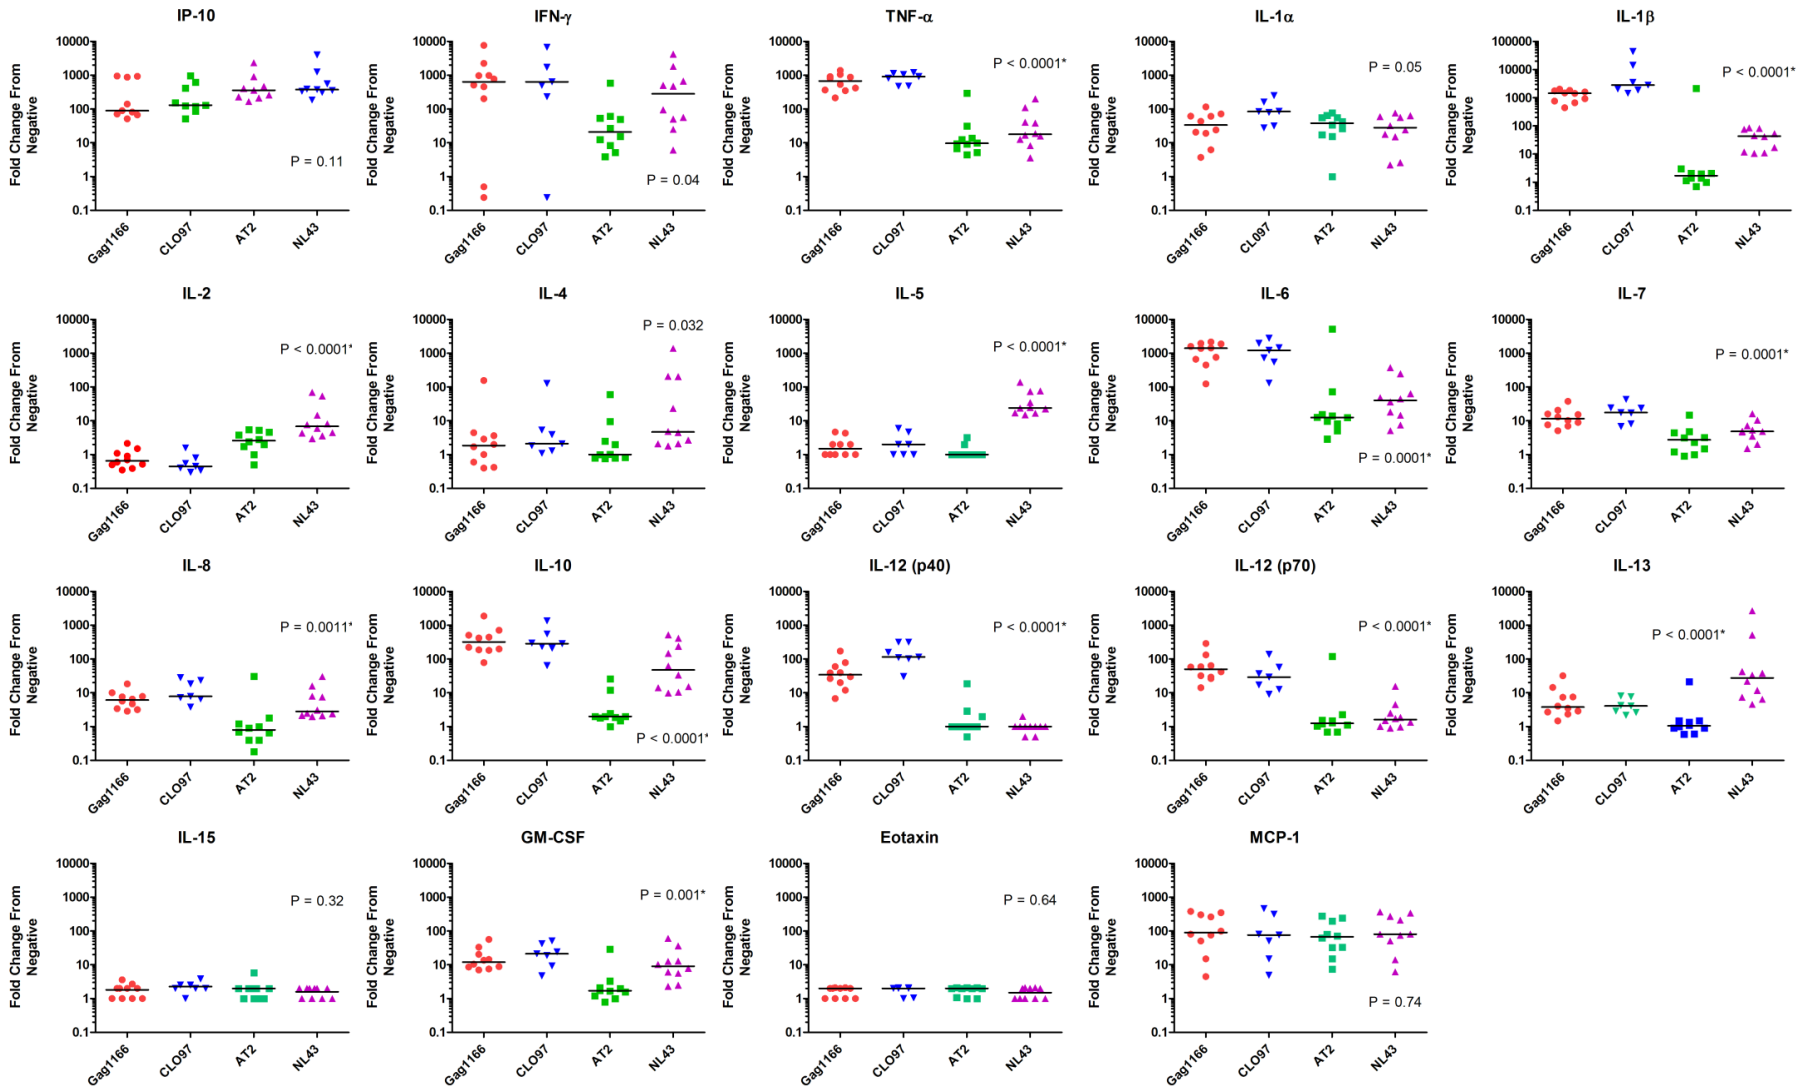

Supplement: NIHMS646332-supplement-supplement_1.pdf [file NIHMS646332-supplement-supplement_1.pdf]
